# Supplementary material for: WITHDRAWN: Asymmetrical response of summer rainfall in East Asia to CO2 forcing
Source: Research Square preprint supplement (doi:10.21203/rs.3.rs-146325/v1), 2021-01-19
Supplement: Supplementary file 1 [file e8104ec354ded91a99ccd406.docx]

**Supplementary Information**

# **Asymmetrical response of summer rainfall in East Asia to CO2 forcing**

Se-Yong Song1, Sang-Wook Yeh1, Soon-II An2, Jong-Seong Kug3, Seung-Ki Min3,

Seok-Woo Son4, and Jongsoo Shin2

1Department of Marine Sciences and Convergence Technology, Hanyang University, Ansan, South Korea

2Department of Atmospheric science, Yonsei University, Seoul, South Korea

3POSTECH, Pohang, South Korea

4School of Earth and Environmental Science, Seoul National University, Seoul, South Korea

**Supplementary Information**

Supplementary Figures 1-3


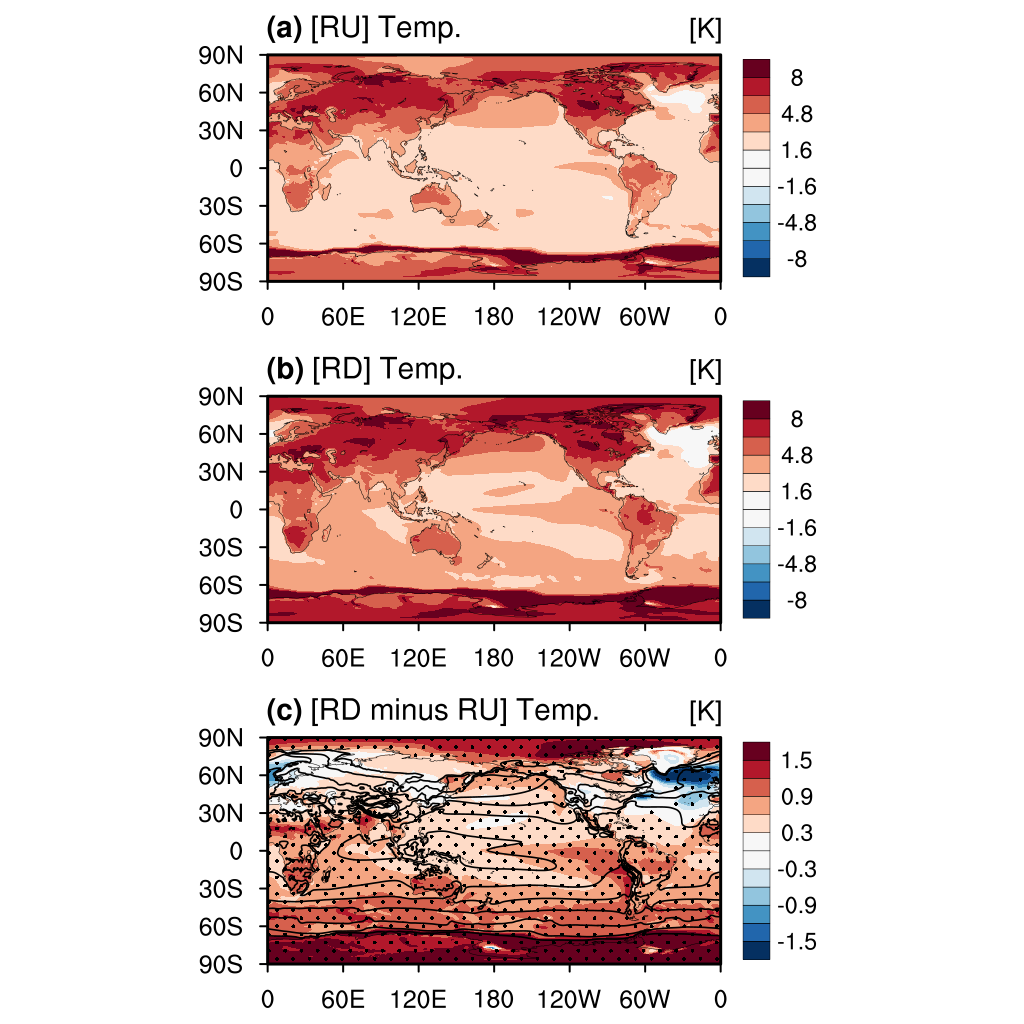


**Supplementary Figure 1.** Surface temperature anomalies (K) during the (a) ramp-up (2090-2139) and (b) ramp-down (2141-2190) periods during boreal summer. (c) Differences in surface temperature (shading, K) anomalies between the ramp-down and ramp-up periods. Black contours in (c) indicate the climatological surface temperature patterns obtained from the PD simulation. Black dots denote that the regions are significant at a 95% confidence level.


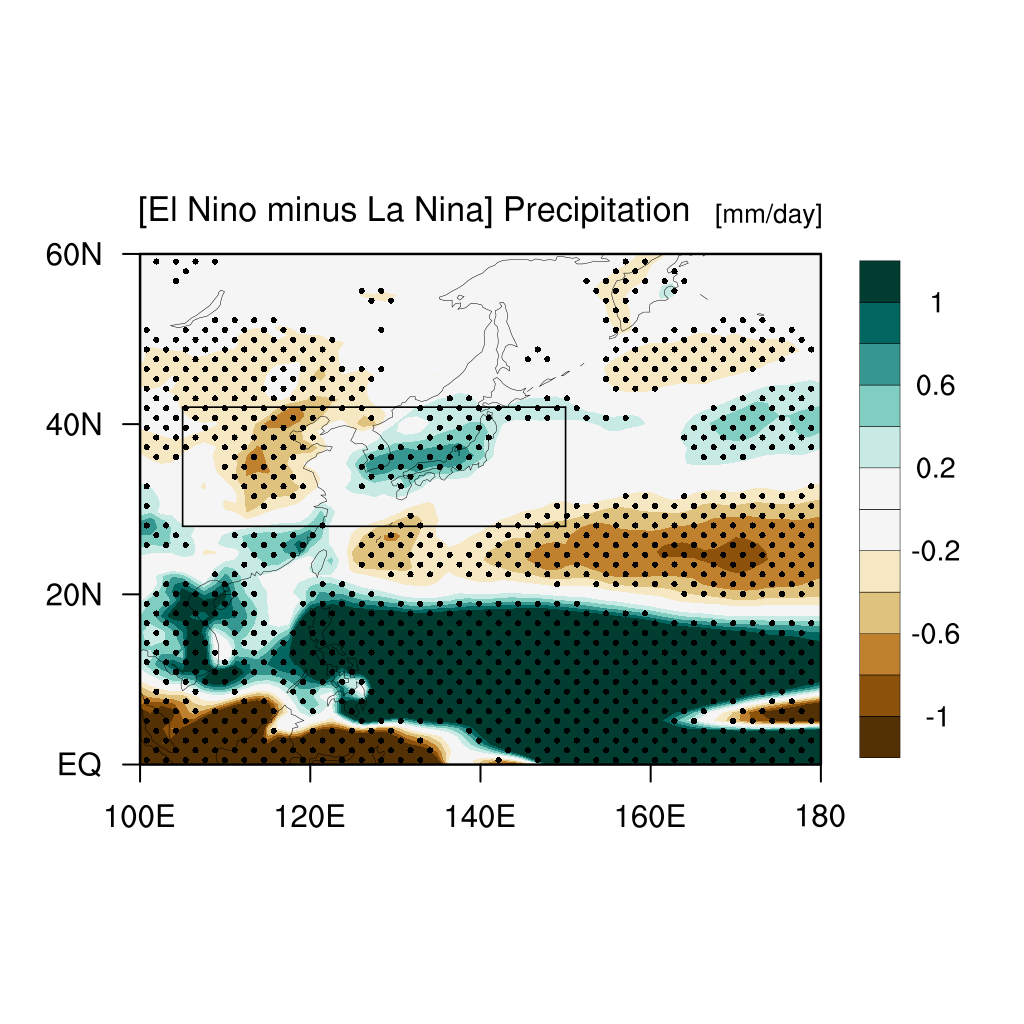


**Supplementary Figure 2.** Difference of composited rainfall anomalies between El Niño and La Niña years during boreal summer in a PD simulation. The El Niño (La Niña) years are selected when the SST anomaly averaged over the eastern tropical Pacific (5S-5N, 190-250E) during boreal summer is higher (less) than (-) 0.5 standard deviation. Black dots denote that the regions are significant at a 95% confidence level. The black box indicates the East Asia (28°-42°N, 105°-150°E) region.


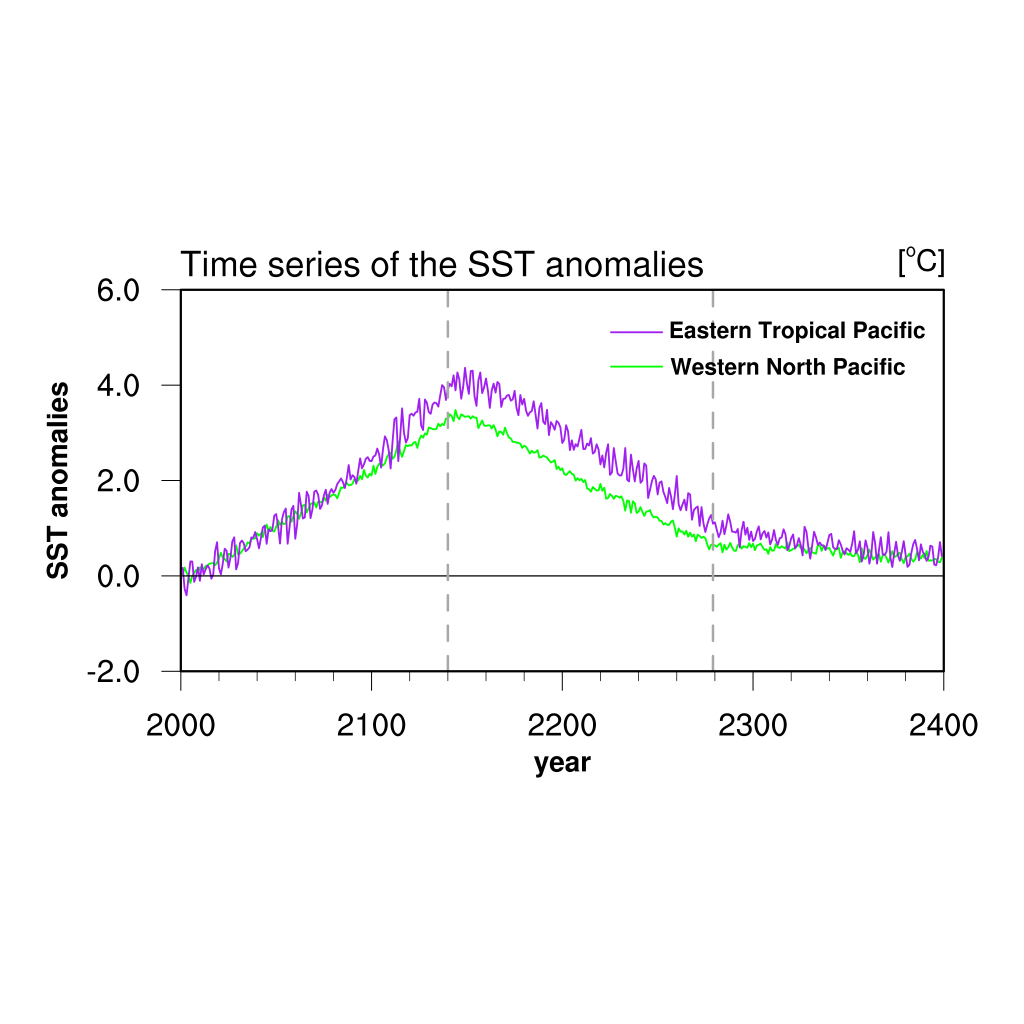


**Supplementary Figure 3.** Time series of the SST anomalies averaged over the eastern tropical Pacific (purple, 5S-5N, 190-250E) and western North Pacific (green, 15-25N, 120-150E) during boreal summer. Grey vertical dotted line denotes the CO2 peak and stabilization start year.
